# Supplementary material
Source: ML conference proceedings conference paper supplement (https://openaccess.thecvf.com/content/WACV2023/html/Wang_Interacting_Hand-Object_Pose_WACV_2023_paper.html)
Supplement: Supplementary file 3 [file Wang_Interacting_Hand-Object_Pose_WACV_2023_supplemental.zip]

Archive with 4 entries (4 files):
- 1744-supp.mp4
- __MACOSX/._1744-supp.mp4
- 1744-supp.pdf
- __MACOSX/._1744-supp.pdf
